# Supplementary material for: Phenyl-γ-valerolactones and phenylvaleric acids, the main colonic metabolites of flavan-3-ols: synthesis, analysis, bioavailability, and bioactivity
Source: Royal Society of Chemistry journal article supplement (doi:10.1039/c8np00062j), 2018-11-23
Supplement: c8np00062j1.pdf [file c8np00062j1.pdf]

## SUPPLEMENTARY INFORMATION

### **Phenyl- $\gamma$ -valerolactones and phenylvaleric acids, the main colonic metabolites of flavan-3-ols: synthesis, analysis, bioavailability, and bioactivity**

Pedro Mena,<sup>a,^,\*</sup> Letizia Bresciani,<sup>b,^</sup> Nicoletta Brindani,<sup>a</sup> Iziar A. Ludwig,<sup>c</sup> Gema Pereira-Caro,<sup>d</sup> Donato Angelino,<sup>a</sup> Rafael Llorach,<sup>e</sup> Luca Calani,<sup>a</sup> Furio Brighenti,<sup>a</sup> Michael N. Clifford,<sup>f</sup> Chris Gill,<sup>g</sup> Alan Crozier,<sup>h</sup> Claudio Curti,<sup>a</sup> and Daniele Del Rio<sup>b,i</sup>

<sup>a</sup> Department of Food & Drugs, University of Parma, Parma, Italy.

<sup>b</sup> Department of Veterinary Science, University of Parma, Parma, Italy.

<sup>c</sup> Food Technology Department, Universitat de Lleida-Agrotecnio Center, Lleida, Spain.

<sup>d</sup> Department of Food Science and Health. IFAPA-Alameda del Obispo, Córdoba, Spain.

<sup>e</sup> Biomarkers & Nutrimetabolomics Laboratory, Department of Nutrition, Food Sciences and Gastronomy, XaRTA, INSA, Faculty of Pharmacy and Food Sciences, Campus Torribera, University of Barcelona, Barcelona, Spain. CIBER de Fragilidad y Envejecimiento Saludable (CIBERFES), Instituto de Salud Carlos III, Barcelona, Spain.

<sup>f</sup> School of Bioscience and Medicine, Faculty of Health and Medical Sciences, University of Surrey, Guildford, UK.

<sup>g</sup> Nutrition Innovation Centre for Food and Health, Centre for Molecular Biosciences, University of Ulster, Coleraine, Northern Ireland, UK.

<sup>h</sup> Department of Nutrition, University of California, Davis, California, USA, and School of Medicine, Dentistry and Nursing, University of Glasgow, Glasgow, UK.

<sup>i</sup> School of Advanced Studies on Food and Nutrition, University of Parma, and Microbiome Research Hub, University of Parma, Parma, Italy.

<sup>^</sup> These authors contributed equally to this work

\*Corresponding author: Pedro Mena, University of Parma, Via Volturno 39, 43125 Parma, Italy. Phone: (+39) 0521-903841. E-mail address: [pedromiguel.menaparreno@unipr.it](mailto:pedromiguel.menaparreno@unipr.it)

## SUPPLEMENTARY INFORMATION

**Supplementary Table S1.** Summary of analytical methods for the analysis of PVLs and PVAs in biological samples. ET means enzymatic treatment; LD, limits of detection; AS, available standards; GIT, gastrointestinal tract; VL,  $\gamma$ -valerolactone; and VA, valeric acid.

| Analytical Techniques                              | Food Intake                                                  | Fluid/Tissue                                   | Separation                                           | ET  | Identified Metabolites                                                                                               | LD             | AS  | Refs. |
|----------------------------------------------------|--------------------------------------------------------------|------------------------------------------------|------------------------------------------------------|-----|----------------------------------------------------------------------------------------------------------------------|----------------|-----|-------|
| <i>Animals</i>                                     |                                                              |                                                |                                                      |     |                                                                                                                      |                |     |       |
| HPLC-colourimetric electrochemical array detection | (-)-Epicatechin at different doses                           | Urine                                          | WAKOPAC 3C18 column (150 x 4.6 mm, 3 $\mu$ m)        | Yes | 5-(3',4'-dihydroxyphenyl)VL                                                                                          | -              | Yes | 46    |
| HPLC-MS/MS                                         | Catechin, dimer B3, trimer C2 and mixed polymers of catechin | Urine                                          | Hypersil BDS C18 (150 x 2.1 mm, 5 $\mu$ m)           | Yes | 5-(3',4'-dihydroxyphenyl)VA; 5-(3'-hydroxyphenyl)VA                                                                  | 0.05-6 $\mu$ M | Yes | 45    |
| HPLC-MS/MS                                         | Soluble cocoa powder                                         | Urine                                          | Luna C18 column (50 x 2.0 mm, 5 $\mu$ m)             | Yes | 5-(3',4'-dihydroxyphenyl)VL; 5-(4'-hydroxyphenyl)VL-3'-methoxy                                                       | -              | No  | 49    |
| UHPLC-MS/MS                                        | Nuts-cocoa cream                                             | Large intestine                                | Acquity HSS T3 column (100 x 2.1 mm, 1.8 $\mu$ m)    | No  | 5-(3',4'-dihydroxyphenyl)VL; 5-(hydroxyphenyl)VL                                                                     | -              | No  | 170   |
| UHPLC-MS/MS                                        | Catechin and procyanidin rich grape extract                  | Cecum, proximal and distal colon               | Acquity HSS T3 column (100 x 2.1 mm, 1.8 $\mu$ m)    | No  | 5-(3',4'-dihydroxyphenyl)VL; 4-hydroxy-5-(3',4'-dihydroxyphenyl)VA                                                   | -              | No  | 174   |
| UHPLC-TOF-MS/MS                                    | Grape seed proanthocyanidin extract                          | Plasma                                         | Zorbax SB-Aq Column (150 x 2.1 mm, 3.5 $\mu$ m)      | No  | 5-(3',4'-dihydroxyphenyl)VL                                                                                          | 14.4 nM        | Yes | 171   |
| UHPLC-Q-Orbitrap-HRMS                              | Partially purified cranberry or apple procyanidins           | Plasma                                         | Ace Excel 2 C18-PFP column (100 x 2.1 mm, 2 $\mu$ m) | No  | 5-(3',4'-dihydroxyphenyl)VA; 4-hydroxy-5-phenylVA-sulphate; 5-phenylVL-sulphate                                      | -              | No  | 153   |
| HPLC-RC-MS <sup>2</sup>                            | [2- <sup>14</sup> C](-)-Epicatechin                          | Tissues from the GIT, plasma, urine and faeces | Luna Phenyl Hexyl Column (250 x 4.6 mm, 5 $\mu$ m)   | No  | 5-(3',4'-dihydroxyphenyl)VL; 5-(4'-hydroxyphenyl)VL-3'-sulphate; 4-hydroxy-5-(3',4'-dihydroxyphenyl)VA; 4-hydroxy-5- | -              | Yes | 93    |

**SUPPLEMENTARY INFORMATION**

| <b>Analytical Techniques</b>                       | <b>Food Intake</b>                                                    | <b>Fluid/Tissue</b>       | <b>Separation</b>                                 | <b>ET</b> | <b>Identified Metabolites</b>                                                                        | <b>LD</b>   | <b>AS</b> | <b>Refs.</b> |
|----------------------------------------------------|-----------------------------------------------------------------------|---------------------------|---------------------------------------------------|-----------|------------------------------------------------------------------------------------------------------|-------------|-----------|--------------|
|                                                    |                                                                       |                           |                                                   |           | (3'-hydroxyphenyl)VA-4'-glucuronide; 4-hydroxy-5-(4'-hydroxyphenyl)VA; among other minor derivatives |             |           |              |
| UPLC-DAD-ESI-IT-TOF-MS <sup>n</sup>                | Procyanidin B2                                                        | Tissues, plasma and urine | HR-ODS Column (150 x 2.1mm, 3µm)                  | No        | 45 metabolites tentatively identified                                                                | -           | No        | 173          |
| UHPLC-Orbitrap-HRMS                                | Red wine proanthocyanidin extract                                     | Urine, plasma and faeces  | Kinetex Phenyl-Hexyl 100 A (150 x 4.6 mm, 2.6 µm) | No        | 5-(3',4'-dihydroxyphenyl)VL; 5-(hydroxyphenyl)VL; 5-phenylVL-3'-sulphate; 5-phenylVL-3'-glucuronide  | 1 to 670 nM | Yes       | 65           |
| <i>Humans</i>                                      |                                                                       |                           |                                                   |           |                                                                                                      |             |           |              |
| HPLC-coulorimetric electrochemical array detection | Green tea                                                             | Plasma and urine          | NBS C18 column (150 x 4.6 mm, 5 µm)               | Yes       | 5-(3',4',5'-trihydroxyphenyl)VL; 5-(3',4'-dihydroxyphenyl)VL                                         | -           | Yes       | 43           |
| HPLC-coulorimetric electrochemical array detection | Flavan-3-ol monomers or procyanidins or flavan-3-ols and procyanidins | Urine                     | Luna C18 (150 x 4.6 mm, 3 µm)                     | Yes       | 5-(3',4'-dihydroxyphenyl)VL                                                                          | 4-6 pmol    | Yes       | 104          |
| HPLC-coulorimetric electrochemical array detection | Green tea                                                             | Urine and plasma          | Alltima C18 column (53 x 7 mm, 5 µ)               | Yes       | 5-(3',4',5'-trihydroxyphenyl)VL; 5-(3',4'-dihydroxyphenyl)VL                                         | -           | No        | 123          |
| HPLC-MS/MS                                         | Green tea                                                             | Urine                     | Gemini C18 column (50 x 2.0 mm, 3 µm)             | No        | 5-(3',4',5'-trihydroxyphenyl)VL; 5-(3',4'-dihydroxyphenyl)VL; glucuronides and sulphates thereof     | -           | Yes       | 16           |
| HPLC-MS/MS                                         | Soluble cocoa powder                                                  | Urine                     | Luna C18 column (50 x 2.0 mm, 5 µm)               | Yes       | 5-(3',4'-dihydroxyphenyl)VL; 5-(4'-hydroxyphenyl)VL-3'-methoxy                                       | -           | No        | 49           |
| HPLC-MS/MS                                         | Almond skin extract                                                   | Urine and                 | Luna C18 column                                   | No        | PVL conjugates                                                                                       | -           | No        | 17           |

**SUPPLEMENTARY INFORMATION**

| <b>Analytical Techniques</b>               | <b>Food Intake</b>                                                             | <b>Fluid/Tissue</b>      | <b>Separation</b>                                                                                                      | <b>ET</b> | <b>Identified Metabolites</b>                                                                                                                  | <b>LD</b>      | <b>AS</b> | <b>Refs.</b> |
|--------------------------------------------|--------------------------------------------------------------------------------|--------------------------|------------------------------------------------------------------------------------------------------------------------|-----------|------------------------------------------------------------------------------------------------------------------------------------------------|----------------|-----------|--------------|
| HPLC-MS/MS and GC-MS/MS                    | Pure epicatechin, procyanidin B1 and polymeric procyanidin fraction from cocoa | Plasma, urine and faeces | (50 x 2.0 mm, 5 µm)<br>PerfectSIL Target ODS-3 column (250 x 3mm, 3µm) and DB-5MS column (30m x 0.25 mm i.d., 0.25 µm) | Yes       | 5-(3',4'-dihydroxyphenyl)VL; 5-(hydroxyphenyl)VL-methoxy; 4-hydroxy-5-(3',4'-dihydroxyphenyl)VA                                                | -              | No        | 107          |
| HPLC-FTMS <sup>n</sup> and HPLC-TOF-MS-NMR | Green tea                                                                      | Urine                    | Luna C18 column (150 x 2.0 mm, 3 µm)                                                                                   | No        | 48 PVL and PVA conjugates                                                                                                                      | -              | No        | 54           |
| UHPLC-MS/MS                                | Green tea                                                                      | Urine                    | Kinetex EVO C18 column (100x 2.1 mm, 2.6 µm)                                                                           | No        | 12 PVL derivatives (aglycones, glucuronides and sulphates)                                                                                     | 0.2 to 1113 nM | Yes       | 63           |
| UHPLC-Q-Orbitrap-HRMS                      | Grape pomace                                                                   | Urine                    | Luna C18 column (50 x 2.0 mm, 5 µm)                                                                                    | No        | 5-(3',4'-dihydroxyphenyl)VL; 4-hydroxy-5-(3',4'-dihydroxyphenyl)VA                                                                             | -              | No        | 116          |
| UHPLC-TOF-MS/MS                            | Cranberry juice                                                                | Plasma and urine         | Zorbax Eclipse Plus RRHD column (50 x 2.1mm, 1.8 µm)                                                                   | No        | 5-(3'-hydroxyphenyl)VL-4'-sulphate                                                                                                             | 0.07 nM        | Yes       | 172          |
| HPLC-MS/MS and HPLC-RC-MS/MS               | [2- <sup>14</sup> C](-)-Epicatechin                                            | Plasma, urine and faeces | Luna Phenyl Hexyl Column (250 x 4.6 mm, 5 µm)                                                                          | No        | 3 5-(hydroxyphenyl)VLs; 3 5-(dihydroxyphenyl)VLs; 1 4-hydroxy-5-(hydroxyphenyl)VA; 3 4-hydroxy-5-(dihydroxyphenyl)Vas. All phase II conjugates | -              | Yes       | 2            |
| UHPLC-Q-Orbitrap-HRMS                      | Cranberry juice                                                                | Plasma                   | Ace Excel 2 C18-PFP column (100 x 2.1mm, 2µm)                                                                          | No        | 5-(3',4',5'-trihydroxyphenyl)VL                                                                                                                | -              | No        | 130          |

**SUPPLEMENTARY INFORMATION**

| <b>Analytical Techniques</b> | <b>Food Intake</b>                                                                | <b>Fluid/Tissue</b> | <b>Separation</b>                            | <b>ET</b> | <b>Identified Metabolites</b>                                                                                                                      | <b>LD</b>        | <b>AS</b> | <b>Refs.</b> |
|------------------------------|-----------------------------------------------------------------------------------|---------------------|----------------------------------------------|-----------|----------------------------------------------------------------------------------------------------------------------------------------------------|------------------|-----------|--------------|
| HPLC-qTOF-MS                 | Grape skin extract                                                                | Urine               | Luna RP 18 (50 x 2.0 mm, 5 µm)               | No        | 7 PVL and PVA phase II conjugates                                                                                                                  | -                | No        | 127          |
| <i>Faeces</i>                |                                                                                   |                     |                                              |           |                                                                                                                                                    |                  |           |              |
| HPLC-MS/MS                   | (-)-Epicatechin and (+)-catechin                                                  | Faecal incubates    | Nova-Pak C18 column (250 x 4.6 mm, 4 µm)     | No        | 5-(3',4'-dihydroxyphenyl)VL; 5-phenylVL                                                                                                            | -                | No        | 147          |
| HPLC-LCT-TOF-ESI             | Procyanidin dimer                                                                 | Faecal incubates    | Inertsil ODS-3 (4.6 x 150 mm, 5 µm)          | No        | 5-(3',4'-dihydroxyphenyl)VL; 5-(hydroxyphenyl)VL; 5-(3',4'-dihydroxyphenyl)VA; 5-(hydroxyphenyl)VA                                                 | -                | No        | 48           |
| UHPLC-MS/MS                  | Catechin, epicatechin, epicatechin gallate, epigallocatechin gallate and dimer B2 | Faecal incubates    | Acquity HSS T3 column (100 x 2.1 mm, 1.8 µm) | No        | 5-(3',4'-dihydroxyphenyl)VL; 5-(hydroxyphenyl)VL                                                                                                   | -                | No        | 170          |
| UPLC-TQ MS                   | Two grape seed flavan-3-ol fractions                                              | Faecal incubates    | BEH C18 column (100 x 2.1 mm, 1.7 µm)        | No        | 5-(3',4'-dihydroxyphenyl)VL; 4-hydroxy-5-(3',4'-dihydroxyphenyl)VA                                                                                 | -                | No        | 118          |
| UPLC-TQ MS                   | Grape seed polyphenols                                                            | Faecal incubates    | BEH C18 column (100 x 2.1 mm, 1.7 µm)        | No        | 5-(3',4'-dihydroxyphenyl)VL; 4-hydroxy-5-(3',4'-dihydroxyphenyl)VA; 5-(3'-hydroxyphenyl)VL; 4-hydroxy-5-(3'-hydroxyphenyl)VA; 4-hydroxy-5-phenylVA | 0.005-0.09 µg/mL | Yes       | 141          |
| UPLC-TQ MS                   | Grape seed polyphenols                                                            | Faecal incubates    | BEH C18 column (100 x 2.1 mm, 1.7 µm)        | No        | 5-(3',4'-dihydroxyphenyl)VL                                                                                                                        | 0.003 µg/mL      | Yes       | 53           |

## SUPPLEMENTARY INFORMATION

**Supplementary Table S2.** Mass spectrometric characteristics of PVL reference standards as assessed by using validated LC-MS methods in negative mode. Frag. Pat. means Fragmentation Pattern; No frag., no fragment available.

| Metabolite                                              | Molecular Formula | Triple quadrupole (MS/MS)    |                            |        |                            |        | HRMS                                         |            | Refs.        |
|---------------------------------------------------------|-------------------|------------------------------|----------------------------|--------|----------------------------|--------|----------------------------------------------|------------|--------------|
|                                                         |                   | Parent Ion<br>( <i>m/z</i> ) | Quantifier                 |        | Qualifier                  |        | Accurate Mass<br>[ <i>m/z</i> ] <sup>-</sup> | Frag. Pat. |              |
|                                                         |                   |                              | Product ion ( <i>m/z</i> ) | CE (V) | Product ion ( <i>m/z</i> ) | CE (V) |                                              |            |              |
| <i>5-(Trihydroxyphenyl)-γ-valerolactone derivatives</i> |                   |                              |                            |        |                            |        |                                              |            |              |
| 5-(3',4',5'-Trihydroxyphenyl)-γ-valerolactone           | C11H12O5          | 223                          | 179                        | 21     | 138                        | 26     |                                              |            | 63           |
| <i>5-(Dihydroxyphenyl)-γ-valerolactone derivatives</i>  |                   |                              |                            |        |                            |        |                                              |            |              |
| 5-(3',4'-Dihydroxyphenyl)-γ-valerolactone               | C11H12O4          | 207                          | 163                        | 20     | 122                        | 25     | 207.0651                                     | No frag.   | 53,63,65,116 |
| 5-(3',5'-Dihydroxyphenyl)-γ-valerolactone               | C11H12O4          | 207                          | 163                        | 18     | 123                        | 20     | 207.0662                                     |            | 63,116       |
| 5-(3'-Hydroxyphenyl)-γ-valerolactone-4'-sulphate        | C11H12O7S         | 287                          | 207                        | 23     | 163                        | 34     | 287.0231                                     |            | 63,172       |
| 5-(4'-Hydroxyphenyl)-γ-valerolactone-3'-sulphate        | C11H12O7S         | 287                          | 207                        | 23     | 163                        | 35     | 287.0219                                     | 207.0651   | 63,65,173    |
| 5-(5'-Hydroxyphenyl)-γ-valerolactone-3'-sulphate        | C11H12O7S         | 287                          | 207                        | 23     | 163                        | 35     |                                              |            | 63,173       |
| 5-(5'-Hydroxyphenyl)-γ-valerolactone-3'-glucuronide     | C17H20O10         | 383                          | 207                        | 24     | 163                        | 40     | 383.097                                      | 207.0651   | 63,65        |
| 5-(3'-Hydroxyphenyl)-γ-valerolactone-4'-glucuronide     | C17H20O10         | 383                          |                            |        |                            |        | 383.097                                      | 207.0651   | 65           |
| 5-Phenyl-γ-valerolactone-3',4'-disulphate               | C11H12O10S2       | 367                          | 287                        | 12     | 207                        | 33     |                                              |            | 63           |
| <i>5-(Hydroxyphenyl)-γ-valerolactone derivatives</i>    |                   |                              |                            |        |                            |        |                                              |            |              |
| 5-(3'-Hydroxyphenyl)-γ-valerolactone                    | C11H12O3          | 191                          | 147                        | 20     | 106                        | 31     | 191.0702                                     | No frag.   | 63,65        |
| 5-(4'-Hydroxyphenyl)-γ-valerolactone                    | C11H12O3          | 191                          | 147                        | 13     | 106                        | 31     |                                              |            | 63           |
| 5-Phenyl-γ-valerolactone-3'-sulphate                    | C11H12O6S         | 271                          | 191                        | 23     | 106                        | 48     | 271.027                                      | 191.0702   | 65           |
| 5-Phenyl-γ-valerolactone-4'-sulphate                    | C11H12O6S         | 271                          | 191                        | 23     | 147                        | 35     |                                              |            | 63           |
| 5-Phenyl-γ-valerolactone-3'-glucuronide                 | C17H20O9          | 367                          | 191                        | 25     | 147                        | 43     | 367.1023                                     | 191.0702   | 63,65        |
| 5-Phenyl-γ-valerolactone-4'-glucuronide                 | C17H20O9          | 367                          |                            |        |                            |        | 367.1023                                     | 191.0702   | 65           |
